# Supplementary material
Source: PubMed Central journal article supplement (PMC6571047)
Supplement: NIHMS1015053-supplement-Supplementary_data.pdf [file NIHMS1015053-supplement-Supplementary_data.pdf]

SUPPLEMENTARY DATA

**Supplemental Table 1 – Characteristics of patients with adequate identifiers for linkage to NDI/UNOS and those with inadequate identifiers**

|                                             | <b>Submitted to NDI<br/>with complete<br/>identifiers</b> | <b>Inadequate<br/>identifiers for<br/>linkage</b> | <b>p-value</b> |
|---------------------------------------------|-----------------------------------------------------------|---------------------------------------------------|----------------|
|                                             | <b>N = 619 (%)</b>                                        | <b>N = 123 (%)</b>                                |                |
| <b>Age ≤7 days at initial surgery</b>       | 512 (82)                                                  | 90 (73)                                           | 0.03           |
| <b>Weight &lt;2.5 kg at initial surgery</b> | 117 (19)                                                  | 21 (17)                                           | 0.73           |
| <b>Male</b>                                 | 345 (56)                                                  | 57 (46)                                           | 0.07           |
| <b>Initial surgery</b>                      |                                                           |                                                   |                |
| Shunt only                                  | 247 (40)                                                  | 54 (44)                                           | 0.11           |
| Shunt + RV Decompression                    | 273 (44)                                                  | 43 (35)                                           |                |
| RV Decompression                            | 96 (15)                                                   | 26 (21)                                           |                |
| <b>Definitive repair</b>                    |                                                           |                                                   |                |
| 1V                                          | 96 (16)                                                   | 12 (10)                                           | 0.02           |
| 1.5 V                                       | 39 (6)                                                    | 2 (2)                                             |                |
| 2V                                          | 225 (36)                                                  | 43 (35)                                           |                |
| None                                        | 259(42)                                                   | 66 (53)                                           |                |
| <b>In-hospital death</b>                    | 162 (26)                                                  | 45 (40)                                           | 0.03           |

**Supplemental Table 2. Comparison of original results to inverse probability weighted (IPW) estimates to assess potential selection bias from the exclusion of patients without full identifiers available for linkage with outcome data**

|                                                                | <b>Original estimate</b> | <b>IPW estimate</b> |
|----------------------------------------------------------------|--------------------------|---------------------|
| <b>Cumulative survival after neonatal intervention</b>         | <b>% (CI %)</b>          | <b>% (CI %)</b>     |
| 1 year                                                         | 68.5 (64.7 – 72.2)       | 66.7 (62.8 – 70.3)  |
| 5 year                                                         | 65.1 (61.2 – 68.7)       | 63.4 (59.4 – 67.0)  |
| 20 year                                                        | 62.1 (58.0 – 65.8)       | 60.5 (56.4 – 64.2)  |
|                                                                |                          |                     |
| <b>20-year survival after discharge from definitive repair</b> | <b>% (CI %)</b>          | <b>% (CI %)</b>     |
| Single ventricle                                               | 97.6 (90.6– 99.4)        | 97.6 (90.6 – 99.4)  |
| One-and-a-half ventricle                                       | 90.9 (74.4 – 97.0)       | 90.8 (74.3 – 96.9)  |
| Two-ventricle                                                  | 98.0 (94.7 – 99.2)       | 97.9 (94.5 – 99.2)  |

IPW = inverse probability weighting

**Supplemental Table 3 - Risk factors for in-hospital death at initial intervention for PA/IVS, sensitivity analysis of birth year as spline vs. original era**

|                                    | Adjusted Original |                     | Adjusted with birth year as spline |                     |
|------------------------------------|-------------------|---------------------|------------------------------------|---------------------|
|                                    | OR                | 95% CI              | OR                                 | 95% CI              |
| <b>Initial intervention</b>        |                   |                     |                                    |                     |
| <b>Shunt only</b>                  | 0.51              | 0.23 – 1.11         | 0.53                               | 0.24 – 1.20         |
| <b>Shunt + RV decompression</b>    | 0.53              | 0.27 – 1.05         | 0.59                               | 0.29 – 1.20         |
| <b>RV decompression</b>            | ref               |                     | ref                                |                     |
| <b>Coronary anatomy</b>            |                   |                     |                                    |                     |
| <b>RV to coronary fistulas</b>     | 1.30              | 0.70 – 2.43         | 1.38                               | 0.73 – 2.60         |
| <b>Atresia of ≥ 1 ostia</b>        | -                 | -                   | -                                  | -                   |
| <b>No abnormalities</b>            | ref               |                     | ref                                |                     |
| <b>Missing</b>                     |                   |                     |                                    |                     |
| <b>Age at initial treatment</b>    |                   |                     |                                    |                     |
| <b>≤ 7 days</b>                    | 0.70              | 0.38 – 1.27         | 0.66                               | 0.36 – 1.23         |
| <b>&gt; 7 days</b>                 | ref               |                     | ref                                |                     |
| <b>Weight at initial treatment</b> |                   |                     |                                    |                     |
| <b>&lt; 2.5 kg</b>                 | 1.35              | 0.73 – 2.49         | 1.25                               | 0.67 – 2.33         |
| <b>≥ 2.5 kg</b>                    | ref               |                     | ref                                |                     |
| <b>Missing</b>                     |                   |                     |                                    |                     |
| <b>Birth era</b>                   |                   |                     |                                    |                     |
| <b>1982 - 1992</b>                 | <b>2.83</b>       | <b>1.51 - 5.32</b>  | -                                  | -                   |
| <b>1993 – 1997</b>                 | 1.47              | 0.74 – 2.92         | -                                  | -                   |
| <b>1998 – 2003</b>                 | ref               |                     | -                                  |                     |
| <b>Sex</b>                         |                   |                     |                                    |                     |
| <b>Male</b>                        | 1.09              | 0.67 - 1.80         | 1.04                               | 0.63 - 1.72         |
| <b>Female</b>                      | ref               |                     | ref                                |                     |
| <b>Chromosomal abnormality</b>     |                   |                     |                                    |                     |
| <b>Yes</b>                         | <b>3.95</b>       | <b>1.15 - 13.55</b> | <b>4.32</b>                        | <b>1.24 – 15.04</b> |
| <b>No</b>                          | ref               |                     | ref                                |                     |

**Supplemental Table 4 - In-hospital neonatal mortality by mode of intervention and birth era**

|                                                   | Era 1             |                      | Era 2             |                      | Era 3             |                      | p-value* |
|---------------------------------------------------|-------------------|----------------------|-------------------|----------------------|-------------------|----------------------|----------|
|                                                   | Total<br>(n= 202) | Death/<br>Transplant | Total<br>(n= 206) | Death/<br>Transplant | Total<br>(n= 211) | Death/<br>Transplant |          |
| <b>Shunt</b>                                      |                   |                      |                   |                      |                   |                      |          |
| Surgical                                          | 71                | 13 (18.3%)           | 84                | 28 (33.3%)           | 92                | 21 (21.5%)           | 0.6306   |
| <b>Shunt + RV Decompression</b>                   |                   |                      |                   |                      |                   |                      |          |
| <b>Total</b>                                      | 89                | 22 (24.7%)           | 93                | 10 (10.8%)           | 91                | 9 (9.9%)             | 0.0062   |
| Both surgical                                     | 87                | 22 (25.6%)           | 82                | 9 (11.0%)            | 59                | 6 (10.2%)            | 0.0108   |
| Cath RV Decompression +<br>surgical shunt         | 2                 | 0 (0%)               | 10                | 1 (10.0%)            | 32                | 3 (9.4%)             | 0.8009   |
| Cath RV Decompression +<br>Cath shunt (PDA stent) | 0                 | -                    | 1                 | 0 (0.0%)             | 0                 | -                    | -        |
| <b>RV Decompression</b>                           |                   |                      |                   |                      |                   |                      |          |
| <b>Total</b>                                      | 42                | 13 (31.0%)           | 29                | 7 (24.1%)            | 25                | 3 (12.0%)            | 0.0966   |
| Surgical                                          | 39                | 13 (33.3%)           | 27                | 7 (25.9%)            | 13                | 2 (15.4%)            | 0.2215   |
| Cath                                              | 3                 | 0 (0%)               | 2                 | 0 (0%)               | 12                | 1 (8.3%)             | -        |
| <b>Primary Transplant</b>                         | 0                 | -                    | 0                 | -                    | 2                 | 2 (100%)             | -        |
| <b>Primary Glenn</b>                              | 0                 | -                    | 0                 | -                    | 1                 | 0 (0%)               | -        |

\*Test of trend in neonatal mortality across birth eras within each mode of intervention

**Supplemental Methods:**

Inverse probability weighting was calculated using logistic regression to estimate the probability of having adequate identifiers. The model included sex, birth era, chromosomal abnormality, surgery weight < 2.5 kg, surgery age < 8 days, neonatal intervention, definitive surgical path, and coronary status. The probabilities were applied as weights to patients with full identifiers so that the weighted sample would have the same distribution of characteristics as the full original eligible cohort (those with and without full identifiers).
